# Supplementary material
Source: PubMed Central journal article supplement (PMC6739189)
Supplement: NIHMS1021442-supplement-Supp_figS1-3.pdf [file NIHMS1021442-supplement-Supp_figS1-3.pdf]

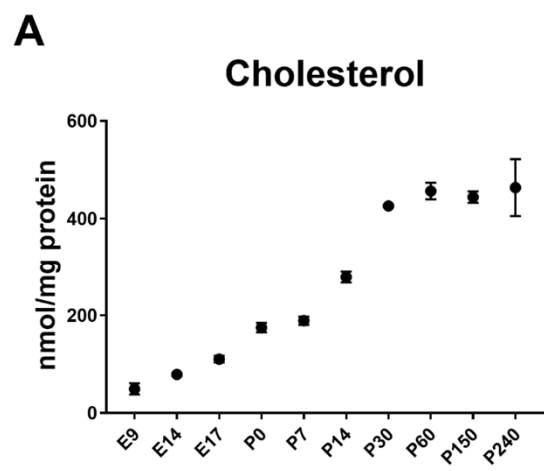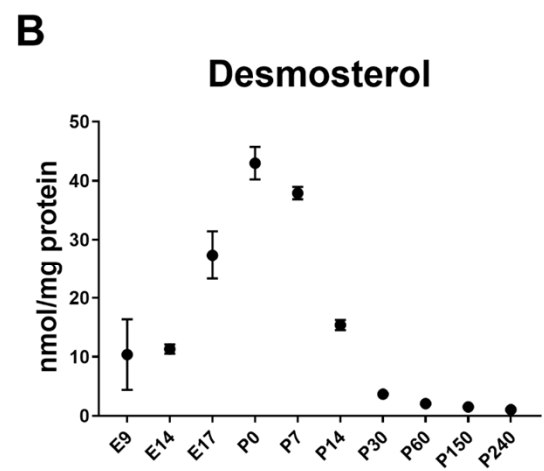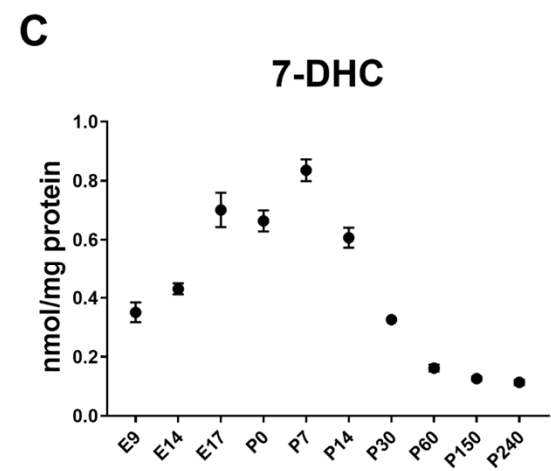

Supplemental Figure 1.

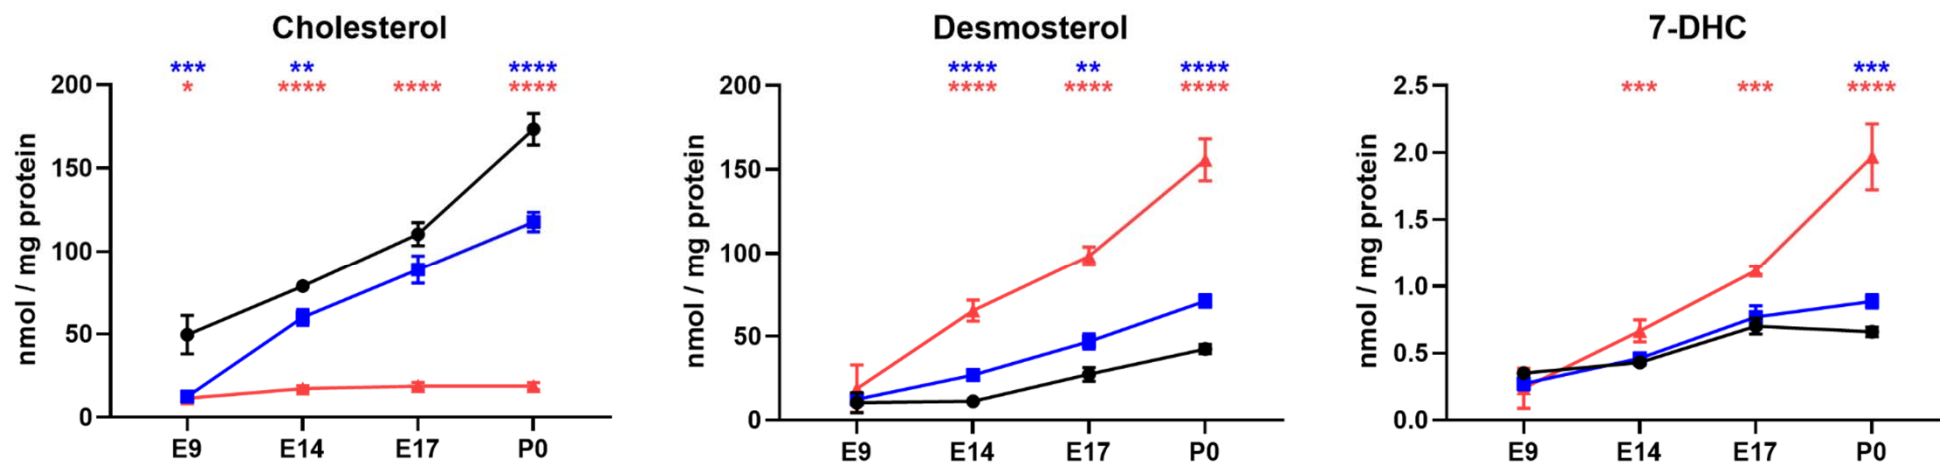

|                          | Cholesterol |         |         |         |                          | Desmosterol |         |         |         |                          | 7-DHC  |        |        |         |
|--------------------------|-------------|---------|---------|---------|--------------------------|-------------|---------|---------|---------|--------------------------|--------|--------|--------|---------|
|                          | E9          | E14     | E17     | P0      |                          | E9          | E14     | E17     | P0      |                          | E9     | E14    | E17    | P0      |
| WT vs. <b>Het</b>        | 0.0008      | 0.0037  | 0.0660  | <0.0001 | WT vs. <b>Het</b>        | 0.7464      | <0.0001 | 0.0063  | <0.0001 | WT vs. <b>Het</b>        | 0.3447 | 0.4284 | 0.5150 | 0.0005  |
| WT vs. <b>KO</b>         | 0.0310      | <0.0001 | <0.0001 | <0.0001 | WT vs. <b>KO</b>         | 0.6118      | <0.0001 | <0.0001 | <0.0001 | WT vs. <b>KO</b>         | 0.5005 | 0.0006 | 0.0002 | <0.0001 |
| <b>Het</b> vs. <b>KO</b> | 0.8559      | 0.0003  | <0.0001 | <0.0001 | <b>Het</b> vs. <b>KO</b> | 0.4853      | <0.0001 | <0.0001 | <0.0001 | <b>Het</b> vs. <b>KO</b> | 0.7715 | 0.0152 | 0.0091 | <0.0001 |

|            | N  |     |     |    |
|------------|----|-----|-----|----|
|            | E9 | E14 | E17 | P0 |
| WT         | 3  | 13  | 8   | 24 |
| <b>Het</b> | 9  | 15  | 8   | 26 |
| <b>KO</b>  | 2  | 4   | 5   | 7  |

Supplemental Figure 2.

# DESMOSTEROLOSIS

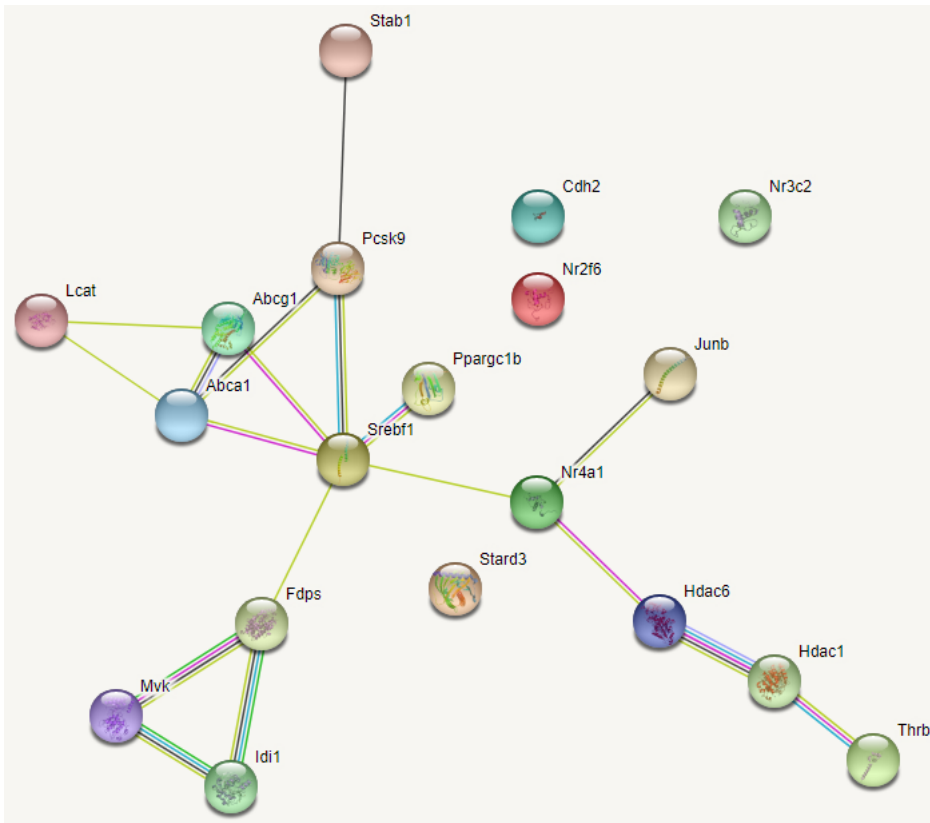

## Network Stats

number of nodes: 19  
 number of edges: 18  
 average node degree: 1.89  
 avg. local clustering coefficient: 0.472

expected number of edges: 2  
 PPI enrichment p-value: 1.52e-12

*your network has significantly more interactions than expected ([what does that mean?](#))*

## Functional enrichments in your network

### Biological Process (GO)

| pathway ID | pathway description                       | count in gene set | false discovery rate |
|------------|-------------------------------------------|-------------------|----------------------|
| GO:0008203 | cholesterol metabolic process             | 8                 | 4.9e-11              |
| GO:0008202 | steroid metabolic process                 | 9                 | 4.91e-11             |
| GO:1901360 | organic cyclic compound metabolic process | 17                | 9.35e-09             |
| GO:0033993 | response to lipid                         | 10                | 9.61e-08             |
| GO:0044249 | cellular biosynthetic process             | 15                | 8.21e-07             |

(more...)

### Molecular Function (GO)

| pathway ID | pathway description                                                                             | count in gene set | false discovery rate |
|------------|-------------------------------------------------------------------------------------------------|-------------------|----------------------|
| GO:0003707 | steroid hormone receptor activity                                                               | 4                 | 0.00022              |
| GO:0034185 | apolipoprotein binding                                                                          | 3                 | 0.00022              |
| GO:0017127 | cholesterol transporter activity                                                                | 3                 | 0.000229             |
| GO:0034186 | apolipoprotein A-I binding                                                                      | 2                 | 0.00162              |
| GO:0004879 | RNA polymerase II transcription factor activity, ligand-activated sequence-specific DNA binding | 3                 | 0.00264              |

(more...)

### Cellular Component (GO)

| pathway ID | pathway description        | count in gene set | false discovery rate |
|------------|----------------------------|-------------------|----------------------|
| GO:0043227 | membrane-bounded organelle | 17                | 0.0428               |

### KEGG Pathways

| pathway ID | pathway description             | count in gene set | false discovery rate |
|------------|---------------------------------|-------------------|----------------------|
| 00900      | Terpenoid backbone biosynthesis | 3                 | 0.000187             |

Supplemental Figure 3A

## SLOS

### Network Stats

number of nodes: 14  
 number of edges: 15  
 average node degree: 2.14  
 avg. local clustering coefficient: 0.469

expected number of edges: 1  
 PPI enrichment p-value: 5.38e-11

*your network has significantly more interactions than expected (what does that mean?)*

### Functional enrichments in your network

#### Biological Process (GO)

| pathway ID | pathway description              | count in gene set | false discovery rate |
|------------|----------------------------------|-------------------|----------------------|
| GO:0008202 | steroid metabolic process        | 9                 | 1.32e-12             |
| GO:0008203 | cholesterol metabolic process    | 8                 | 1.32e-12             |
| GO:0006629 | lipid metabolic process          | 11                | 1.52e-10             |
| GO:0044281 | small molecule metabolic process | 10                | 3.19e-07             |
| GO:0033344 | cholesterol efflux               | 4                 | 1.94e-06             |

(more ...)

#### Molecular Function (GO)

| pathway ID | pathway description                                                                             | count in gene set | false discovery rate |
|------------|-------------------------------------------------------------------------------------------------|-------------------|----------------------|
| GO:0003707 | steroid hormone receptor activity                                                               | 4                 | 8.61e-05             |
| GO:0005496 | steroid binding                                                                                 | 4                 | 8.61e-05             |
| GO:0017127 | cholesterol transporter activity                                                                | 3                 | 8.61e-05             |
| GO:0008289 | lipid binding                                                                                   | 6                 | 0.000372             |
| GO:0004879 | RNA polymerase II transcription factor activity, ligand-activated sequence-specific DNA binding | 3                 | 0.00114              |

(more ...)

#### KEGG Pathways

| pathway ID | pathway description                       | count in gene set | false discovery rate |
|------------|-------------------------------------------|-------------------|----------------------|
| 00100      | Steroid biosynthesis                      | 2                 | 0.0134               |
| 04932      | Non-alcoholic fatty liver disease (NAFLD) | 3                 | 0.0134               |
| 02010      | ABC transporters                          | 2                 | 0.0327               |

#### PFAM Protein Domains

| pathway ID | pathway description                               | count in gene set | false discovery rate |
|------------|---------------------------------------------------|-------------------|----------------------|
| PF00104    | Ligand-binding domain of nuclear hormone receptor | 4                 | 1.87e-06             |
| PF00105    | Zinc finger, C4 type (two domains)                | 4                 | 1.87e-06             |

#### INTERPRO Protein Domains and Features

| pathway ID | pathway description                             | count in gene set | false discovery rate |
|------------|-------------------------------------------------|-------------------|----------------------|
| IPR000536  | Nuclear hormone receptor, ligand-binding domain | 4                 | 2.74e-06             |
| IPR001628  | Zinc finger, nuclear hormone receptor-type      | 4                 | 2.74e-06             |
| IPR001723  | Nuclear hormone receptor                        | 4                 | 2.74e-06             |
| IPR013088  | Zinc finger, NHR/GATA-type                      | 4                 | 2.82e-06             |

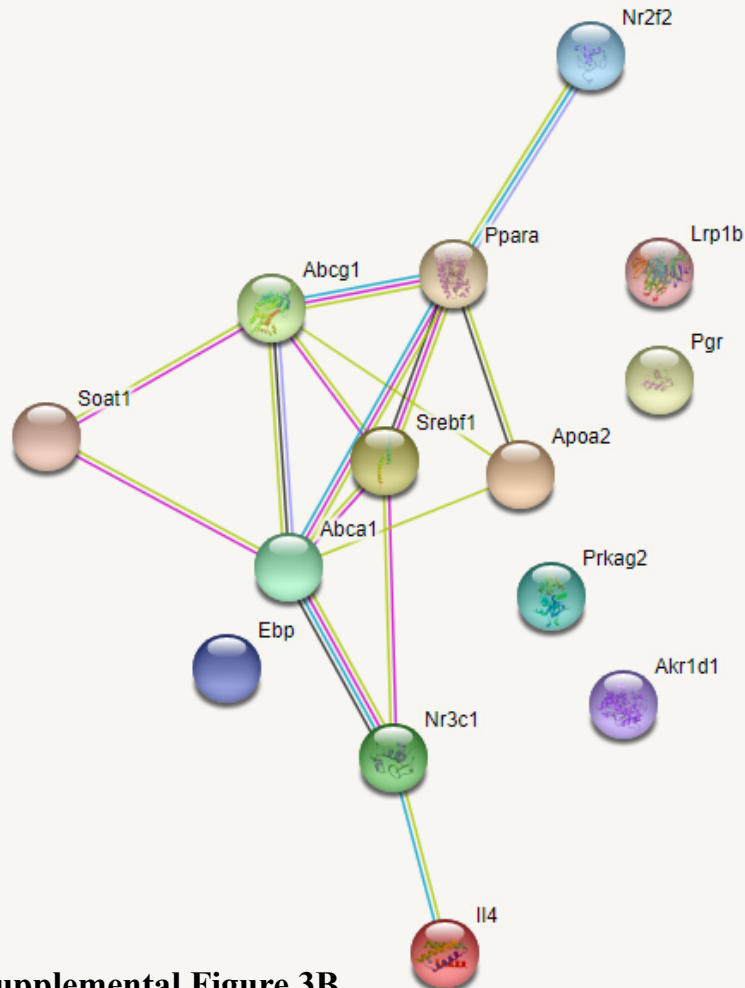

Supplemental Figure 3B
